# Supplementary material for: Effect of a High Proportion of Rye in Compound Feed for Reduction of Salmonella Typhimurium in Experimentally Infected Young Pigs
Source: MDPI journal article supplement (doi:10.3390/microorganisms8111629), 2020-10-22
Supplement: s1 [file s1]

## Supplementary materials

**Supplementary Table S1.** Counts of *Salmonella* (log<sub>10</sub> CFU/g fecal sample) of piglets after an experimental oral infection with *Salmonella* Typhimurium for different diets.

| Group        | <i>Salmonella</i> test                                 | Collection time             |                             |                             |                             |                             |                             |                             |
|--------------|--------------------------------------------------------|-----------------------------|-----------------------------|-----------------------------|-----------------------------|-----------------------------|-----------------------------|-----------------------------|
|              |                                                        | 1 dpi                       | 3 dpi                       | 5 dpi                       | 7 dpi                       | 14 dpi                      | 21 dpi                      | 28 dpi                      |
| Control      | Qualitative<br>(n <sub>pos</sub> /n <sub>total</sub> ) | 21/21                       | 21/21                       | 21/21                       | 21/21                       | 21/21                       | 21/21                       | 21/21                       |
|              | mean                                                   | 3.05 <sup>a</sup><br>± 0.67 | 3.23 <sup>a</sup><br>± 0.57 | 3.37 <sup>a</sup><br>± 0.35 | 3.10 <sup>a</sup><br>± 0.38 | 3.30 <sup>a</sup><br>± 0.50 | 3.11 <sup>a</sup><br>± 0.36 | 3.02 <sup>a</sup><br>± 0.45 |
|              | Quantitative<br>log <sub>10</sub> CFU/g                |                             |                             |                             |                             |                             |                             |                             |
|              | min                                                    | 2.0                         | 2.0                         | 2.6                         | 2.4                         | 2.4                         | 2.4                         | 2.4                         |
|              | max                                                    | 4.4                         | 4.4                         | 4.4                         | 3.6                         | 5.0                         | 3.4                         | 3.4                         |
| Experimental | Qualitative                                            | 21/21                       | 21/21                       | 21/21                       | 21/21                       | 21/21                       | 20/21                       | 20/21                       |
|              | mean                                                   | 2.80 <sup>a</sup><br>± 0.57 | 3.02 <sup>a</sup><br>± 0.51 | 3.20 <sup>a</sup><br>± 0.54 | 2.86 <sup>a</sup><br>± 0.51 | 2.62 <sup>b</sup><br>± 0.17 | 2.40 <sup>b</sup><br>± 0.65 | 2.36 <sup>b</sup><br>± 0.57 |
|              | Quantitative<br>log <sub>10</sub> CFU/g                |                             |                             |                             |                             |                             |                             |                             |
|              | min                                                    | 2.0                         | 2.4                         | 2.6                         | 2.4                         | 2.4                         | 0.0                         | 0.0                         |
|              | max                                                    | 3.6                         | 4.4                         | 4.6                         | 4.4                         | 3.2                         | 3.4                         | 2.6                         |
|              | <i>p</i> -Value                                        | 0.206                       | 0.217                       | 0.229                       | 0.089                       | < 0.001                     | < 0.001                     | 0.001                       |

<sup>a,b</sup> Means in a column with different superscripts differ significantly between group ( $p < 0.05$ ). Control: animals fed with 69% wheat compound pelleted diet; Experimental: animals fed with 69% rye compound pelleted diet.  
dpi = day post infection.

**Supplementary Table S2.** *Salmonella* antibody status in serum of piglets in control and experimental groups (n<sub>pos</sub>/n<sub>total</sub>).

| Collection time                | Group               |                       | <i>p</i> -value |
|--------------------------------|---------------------|-----------------------|-----------------|
|                                | Control (n = 21)    | Experimental (n = 21) |                 |
| Before infection (0 dpi)       | 0 <sup>a</sup> /21  | 0 <sup>a</sup> /21    | 0.834           |
| End of the experiment (28 dpi) | 15 <sup>a</sup> /21 | 13 <sup>a</sup> /21   | 0.466           |

Seropositive: optical density (OD) ≥10%. n<sub>pos</sub> = number of positive samples, n<sub>total</sub> = number of total samples.

Control: animals fed with 69% wheat compound pelleted diet; Experimental: animals fed with 69% rye compound pelleted diet.

**Supplementary Table S3.** Performance data during the entire experimental period, in kg.

| Parameter   |                          | Group                    |                          |
|-------------|--------------------------|--------------------------|--------------------------|
|             |                          | Control (n = 21)         | Experimental (n = 21)    |
| Body weight | 10 days before infection | 7.48 <sup>a</sup> ± 1.11 | 7.48 <sup>a</sup> ± 1.20 |
|             | 7 days before infection  | 8.39 <sup>a</sup> ± 1.01 | 8.44 <sup>a</sup> ± 1.03 |
|             | week 1                   | 2.63 <sup>a</sup> ± 0.68 | 2.80 <sup>a</sup> ± 0.68 |
| Feed intake | week 2                   | 4.01 <sup>a</sup> ± 0.82 | 3.97 <sup>a</sup> ± 0.88 |
|             | week 3                   | 5.68 <sup>a</sup> ± 1.10 | 5.66 <sup>a</sup> ± 1.17 |
|             | week 4                   | 7.54 <sup>a</sup> ± 1.24 | 7.40 <sup>a</sup> ± 1.23 |
|             | week 5                   | 9.78 <sup>a</sup> ± 1.52 | 9.40 <sup>a</sup> ± 1.48 |

<sup>a</sup> Means ± SD within the same row with same superscripts do not differ significantly (*p* > 0.05). Control: animals fed with 69% wheat compound pelleted diet; Experimental: animals fed with 69% rye compound pelleted diet.
